# Supplementary material for: Urinary Sodium Excretion and Obesity Markers among Bangladeshi Adult Population: Pooled Data from Three Cohort Studies
Source: MDPI journal article supplement (doi:10.3390/nu14143000), 2022-07-21

## **Urinary sodium excretion and obesity markers among Bangladeshi adult population: pooled data from three cohort studies**

Musarrat J. Rahman<sup>1</sup>, Sarker M Parvez<sup>2</sup>, Mahbubur Rahman<sup>2</sup>, Feng J. He<sup>3</sup>, Solveig Cunningham<sup>4</sup>, K.M. Venkat Narayan<sup>4</sup>, Jaynal Abedin<sup>5</sup>, Abu Mohd Naser<sup>6</sup>

<sup>1</sup>International Health, Johns Hopkins Bloomberg School of Public Health, Baltimore, Maryland, USA

<sup>2</sup>Environmental Interventions Unit, Infectious Disease Division, icddr,b, Dhaka, Bangladesh

<sup>3</sup>Centre for Environmental and Preventive Medicine, Wolfson Institute of Preventive Medicine, Barts and The London School of Medicine and Dentistry, Queen Mary University of London, United Kingdom

<sup>4</sup>Emory Global Diabetes Research Center, Hubert Department of Global Health, Rollins School of Public Health, Emory University, Atlanta, GA

<sup>5</sup>Data Science Institute, National University of Ireland Galway, Galway, Ireland

<sup>6</sup>Division of Epidemiology, Biostatistics and Environmental Health, School of Public Health, University of Memphis, Memphis, TN

Correspondence: Dr. Abu Mohd Naser, MBBS, PhD

Email: [atitu@memphis.edu](mailto:atitu@memphis.edu)

Division of Epidemiology, Biostatistics, and Environmental Health  
School of Public Health  
University of Memphis

**Figure S1:** Cubic spline plots of 24-hour urinary sodium excretion and waist circumference, BMI, waist to hip ratio and waist to height ratio

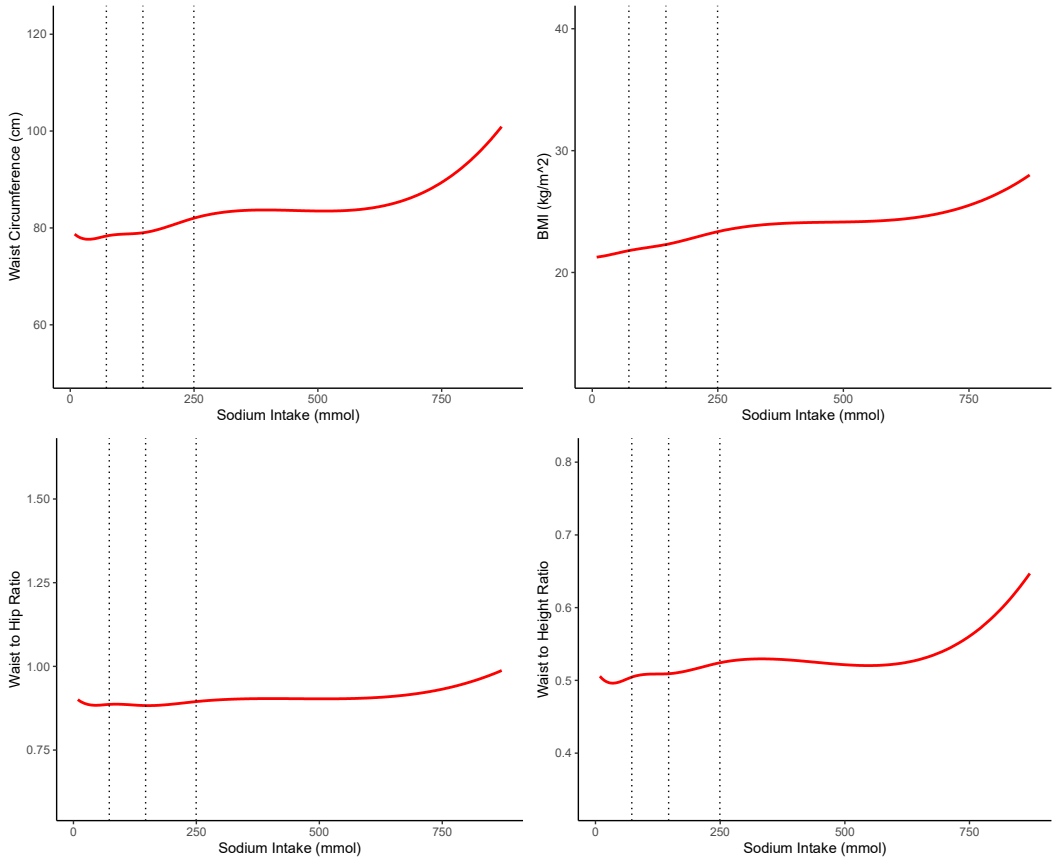

**Figure S2:** Cubic spline plots of 24-hour urinary sodium excretion and body fat percentage and visceral fat percentage

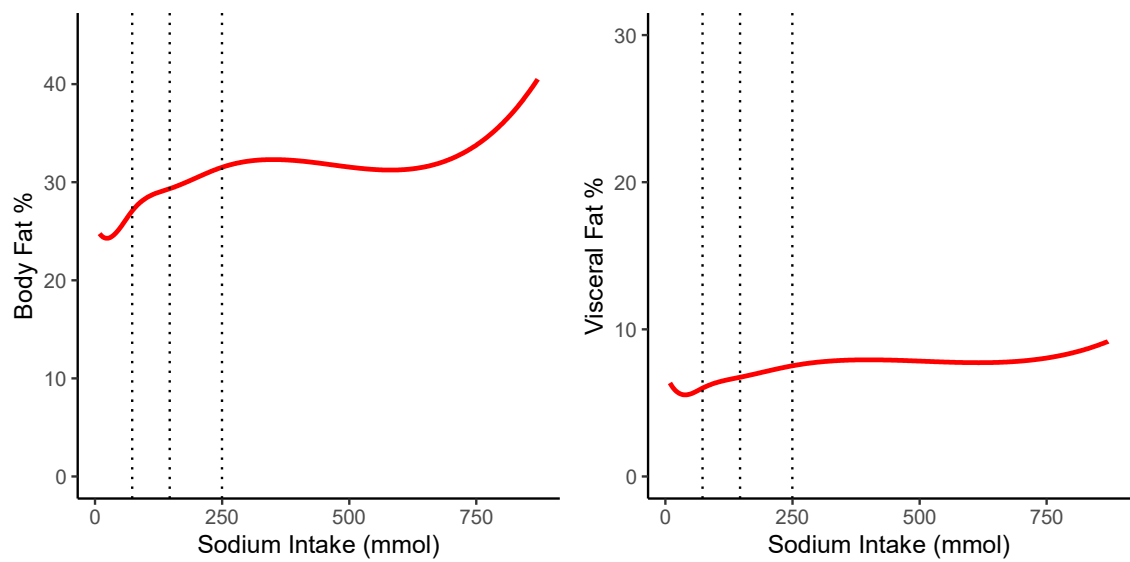

Supplement: s1 [file s1]
